# Supplementary material for: Disruption of Glutamate Homeostasis in the Brain of Rat Offspring Induced by Prenatal and Early Postnatal Exposure to Maternal High-Sugar Diet
Source: MDPI journal article supplement (doi:10.3390/nu14112184), 2022-05-24
Supplement: s1 [file s1]

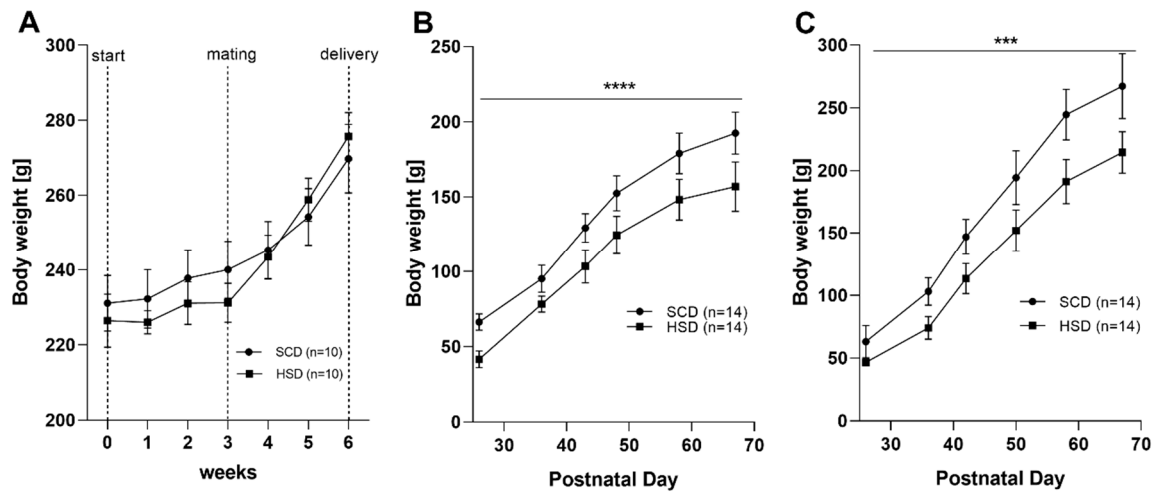

**Figure S1.** Body mass of dams before and during pregnancy (A). Body mass of female (B) and male (C) offspring from postnatal day 28 to 70.

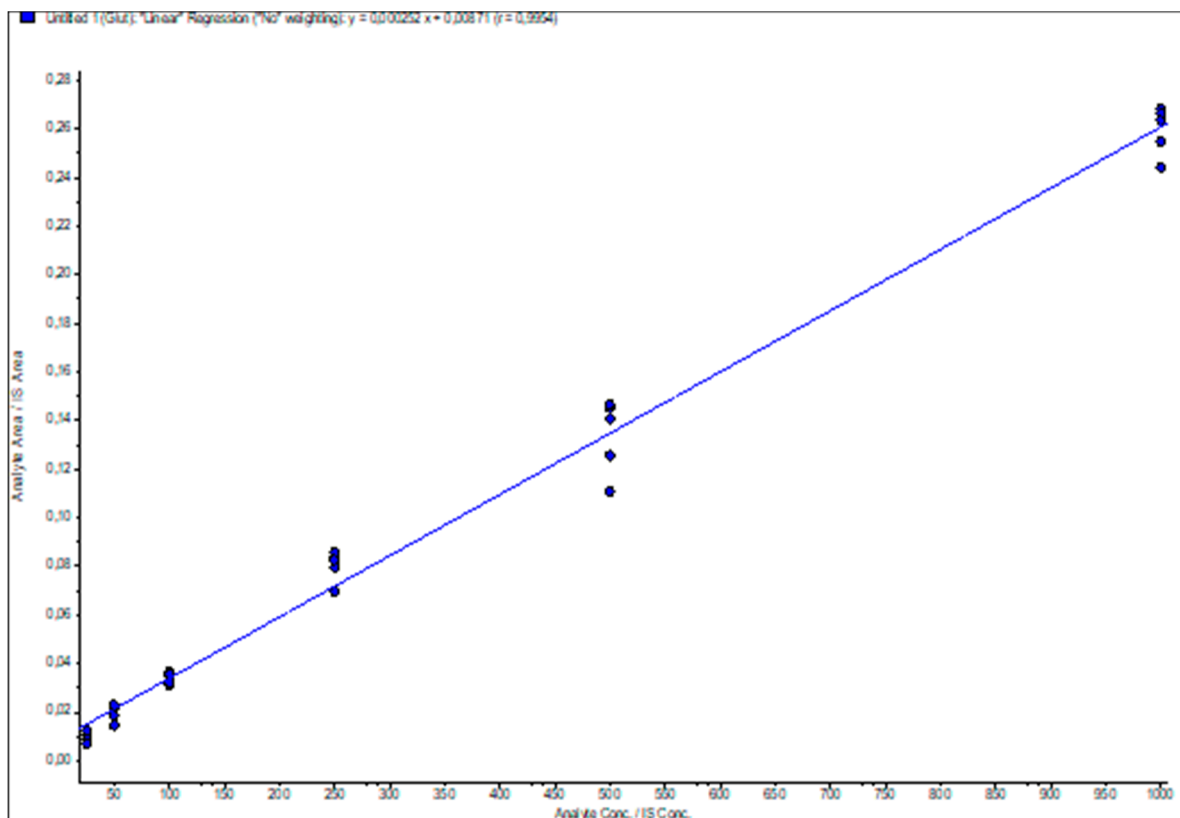

**Figure S2.** Standard calibration curve for glutamate used in LC/MS/MS analysis. Concentration in ng/ml.

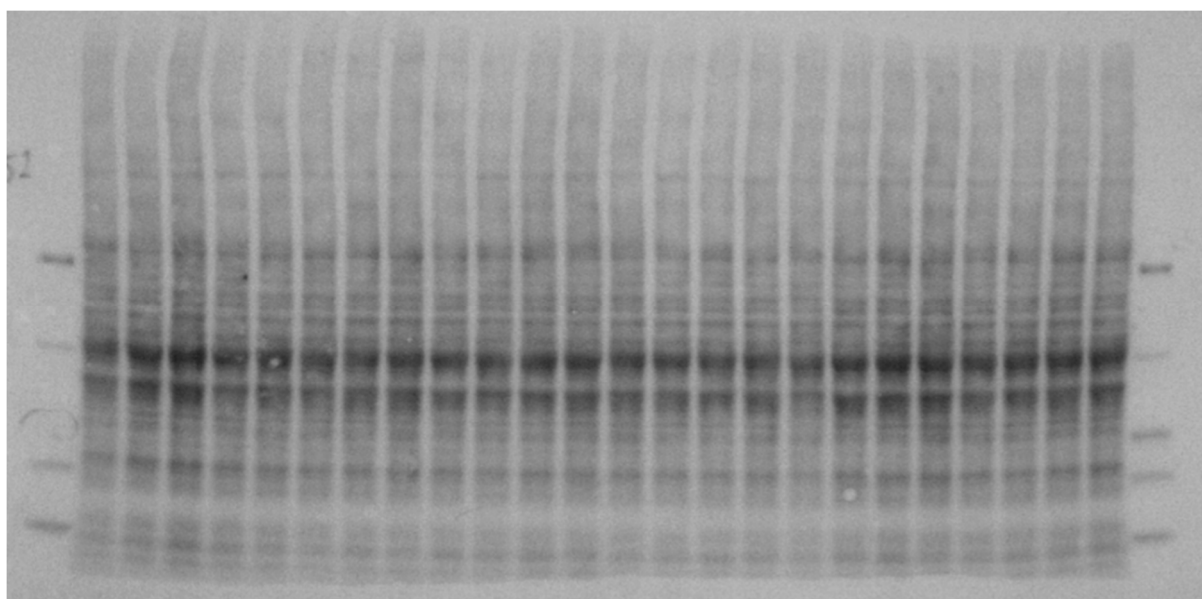

**Figure S3.** Image of PVDF membrane after total protein staining (TPS).

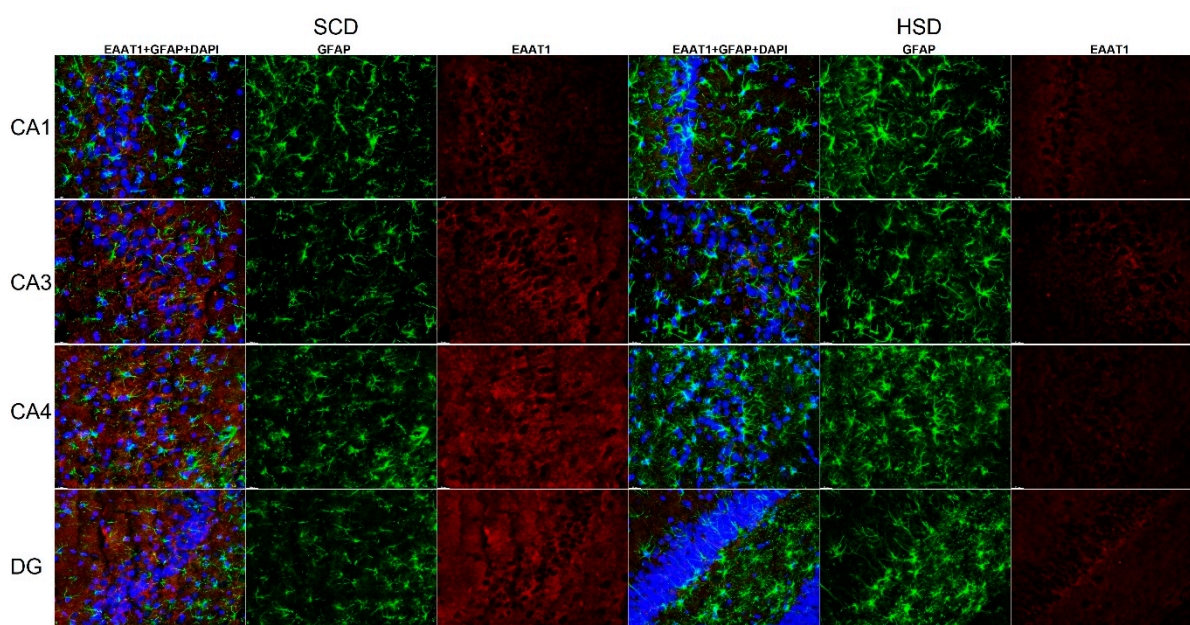

**Figure S4.** Immunohistofluorescence staining of EAAT1 localization on astrocytes in the HIP of male offspring. Representative images showing EAAT1 immunoreactivity (red) in GFAP-positive astrocytes (green) with DAPI-stained nuclei (blue).  $n = 6$  in each group. Magnification  $\times 40$ , scale bar  $20 \mu\text{m}$ .

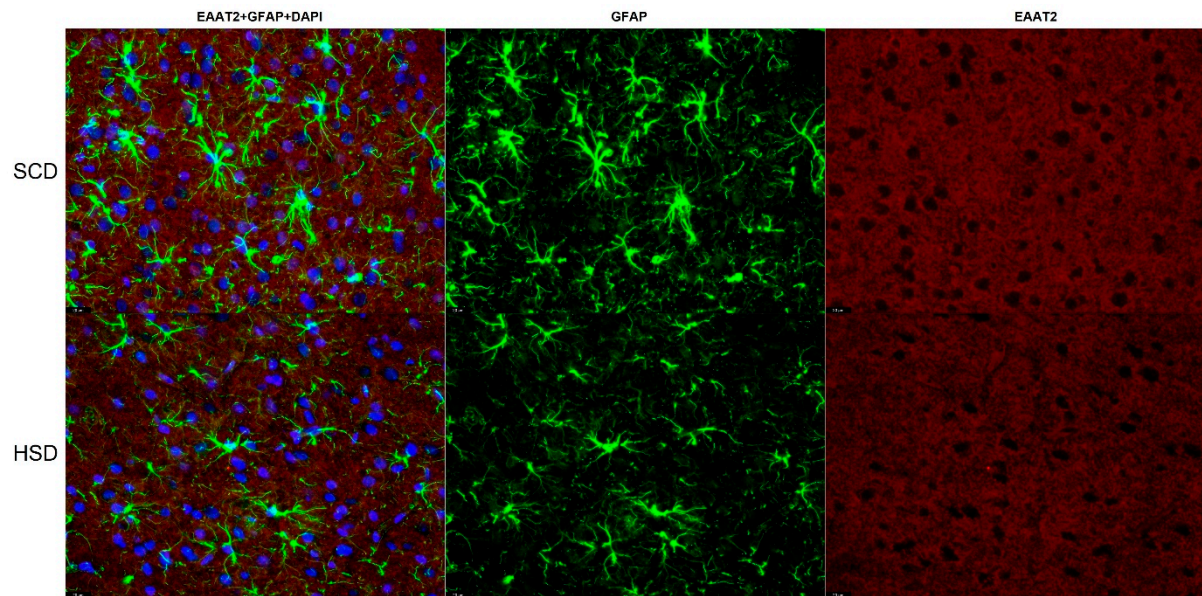

**Figure S5.** Immunohistofluorescence staining of EAAT2 localization on astrocytes in the mPFC of female offspring. Representative images showing EAAT2 immunoreactivity (red) in GFAP-positive astrocytes (green) with DAPI-stained nuclei (blue).  $n = 6$  in each group. Magnification  $\times 40$ , scale bar  $20 \mu\text{m}$ .

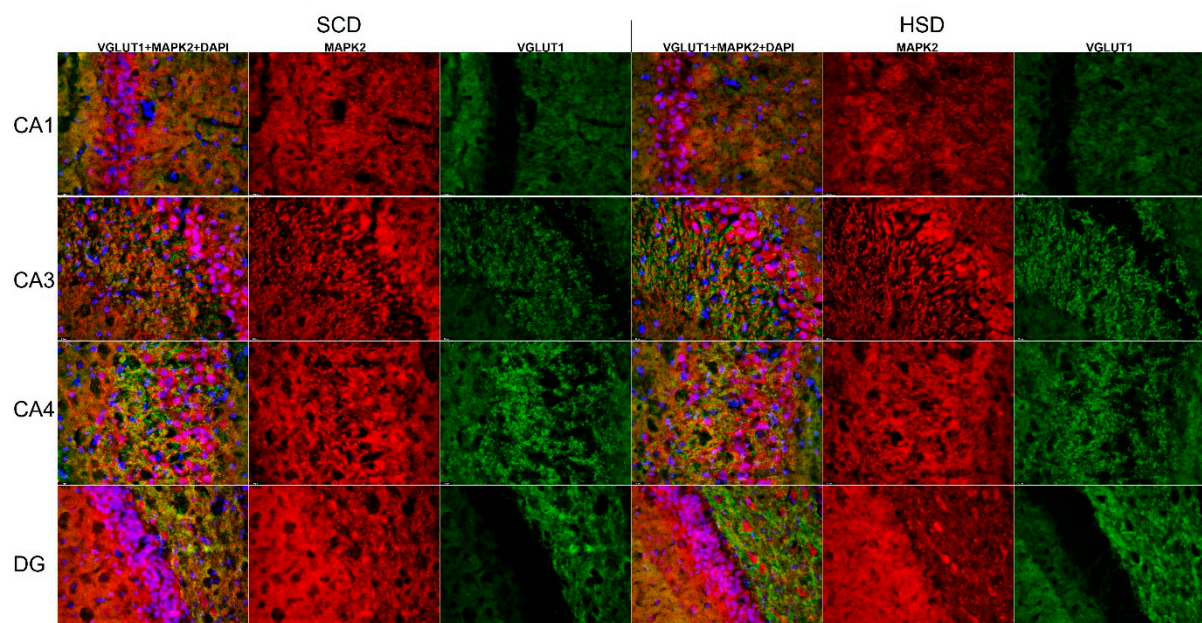

**Figure S6.** Immunohistofluorescence staining of VGLUT1 localization on neurons in the HIP of the female offspring. Representative images showing VGLUT1 immunoreactivity (green) in MAPK2-positive neurons (red) with DAPI-stained nuclei (blue).  $n = 6$  in each group. Magnification  $\times 40$ , scale bar  $20 \mu\text{m}$ .
